# Supplementary material
Source: PubMed Central journal article supplement (PMC4243248)
Supplement: ncomms6482-s1.pdf [file ncomms6482-s1.pdf]

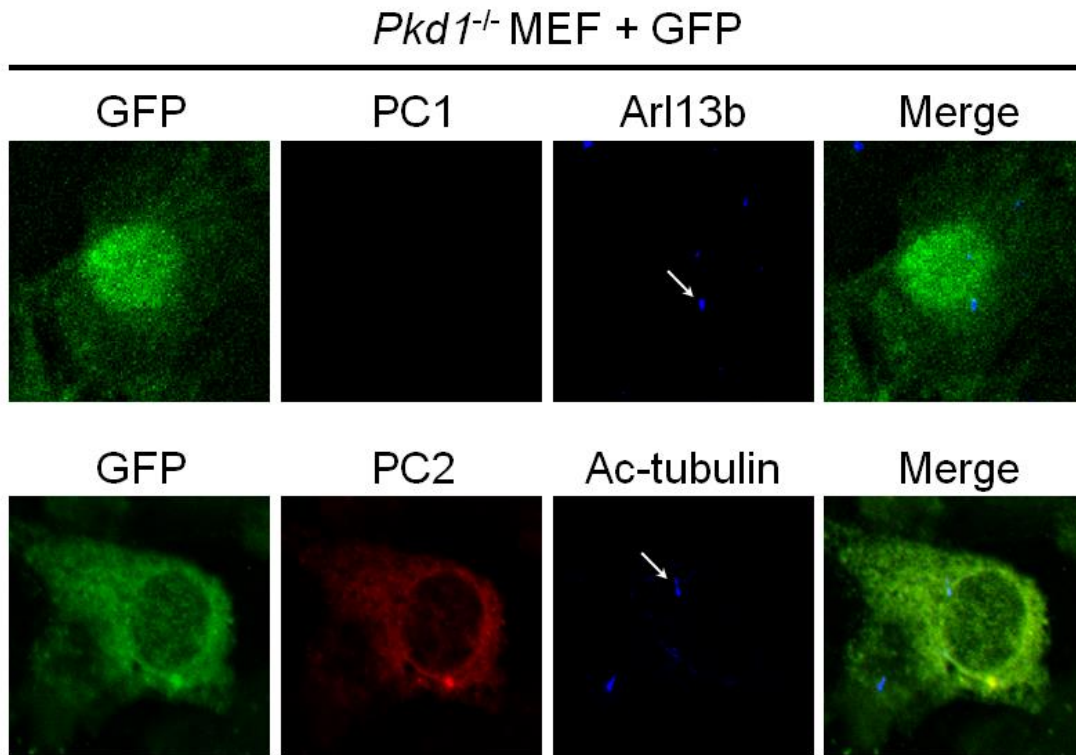

**Supplementary Figure 1** Exogenously expressed GFP does not rescue ciliary localization of PC2 in *Pkd1*<sup>-/-</sup> MEFs. The cells transfected with a GFP expression plasmid were stained with PC1(E4) (upper panel) or PC2 (lower panel). Arl13b or Ac-tubulin was used as a ciliary marker. Cilia are indicated by an arrow.

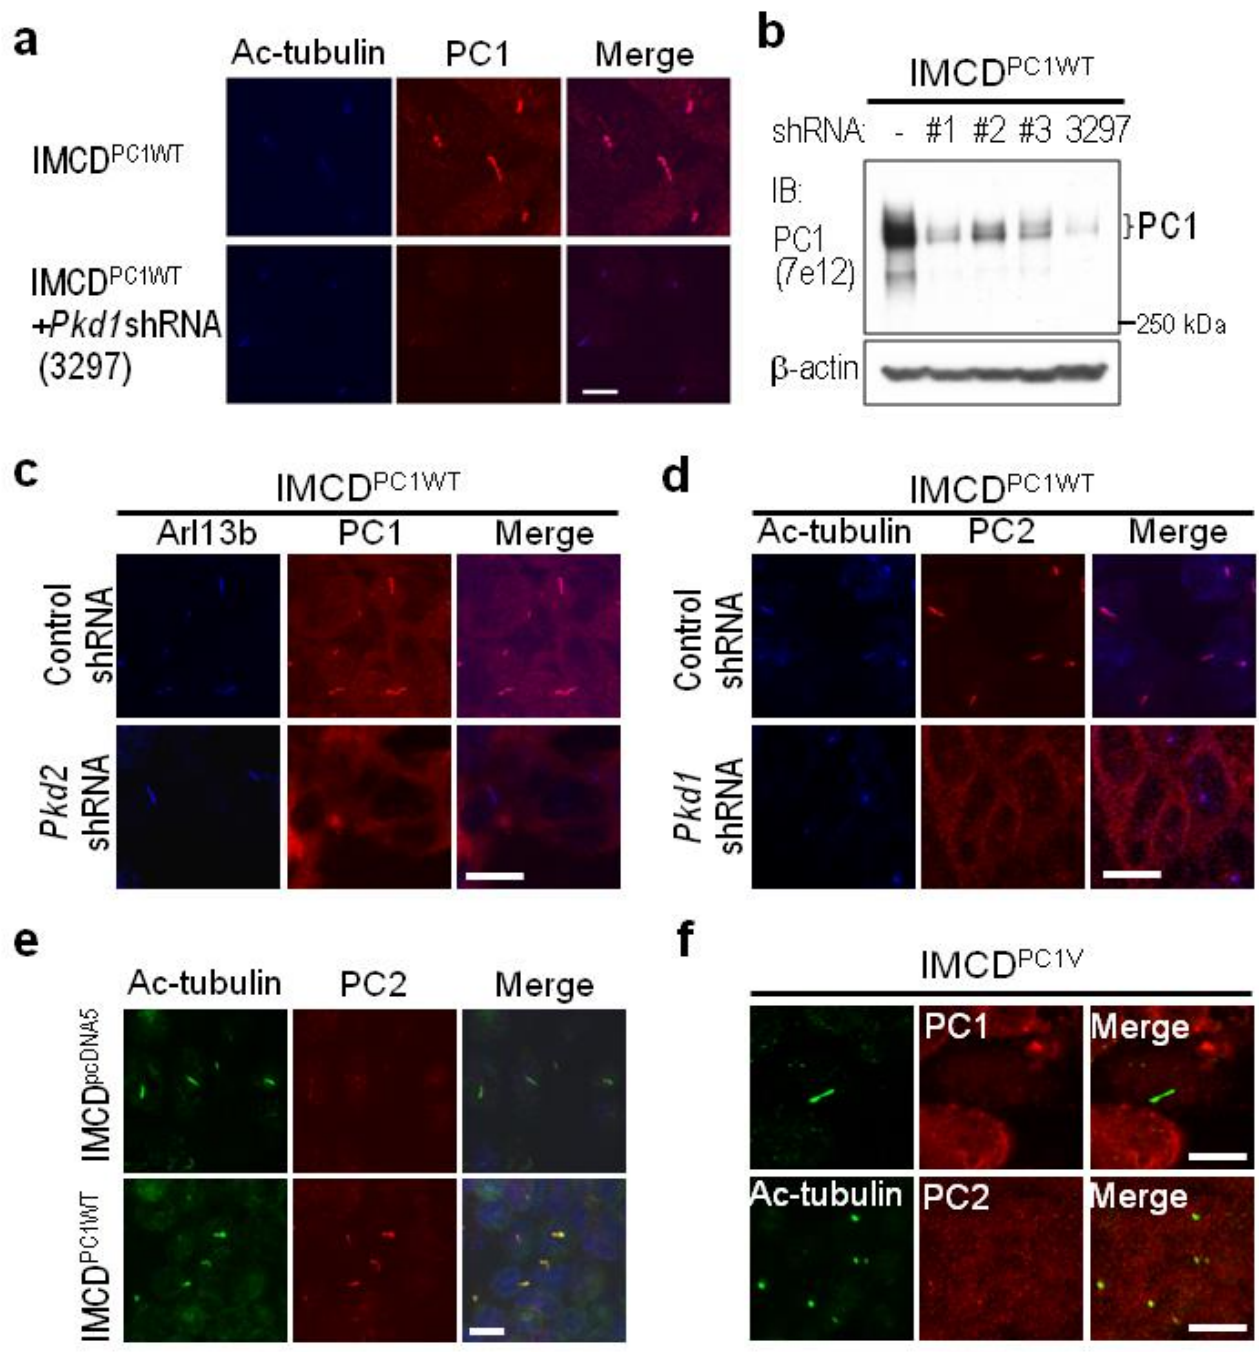

**Supplementary Figure 2** Interdependence of PC1 and PC2 ciliary localization in IMCD cells (**a-e**).

**(a)** Confocal images of IMCD cells with stable expression of full-length C-terminal FLAG-tagged mouse PC1 (IMCD<sup>PC1<sup>WT</sup></sup>, upper panel) and IMCD<sup>PC1<sup>WT</sup></sup> expressing *Pkd1* shRNA 3297<sup>67</sup> (lower panel). Cells were stained with antibodies against PC1(E4) (red) and acetylated (Ac) tubulin (blue). **(b)** Western blot analysis (at right) shows knockdown of PC1 expression in MCD<sup>PC1<sup>WT</sup></sup> cells by various *Pkd1* shRNAs described in Method. **(c)** Confocal images of IMCD<sup>PC1<sup>WT</sup></sup> cells expressing control (upper panel) or *Pkd2* (lower panel) shRNA. Cells were stained with antibodies against PC1(E4) (red) and Arl13b (blue). Note the absence of ciliary staining of PC1 by *Pkd2* shRNA. **(d)** Confocal images of IMCD<sup>PC1<sup>WT</sup></sup> cells expressing control (upper panel) or *Pkd1* (lower panel) shRNA. Cells were stained with antibodies against PC2 (red) and Ac-tubulin (blue). Note the absence of ciliary staining of PC2 by *Pkd1* shRNA. **(e)** Confocal images of IMCD<sup>pcDNA5</sup> cells (empty vector control cells) and MCD<sup>PC1<sup>WT</sup></sup> cells stained with antibodies against PC2 (red) and Ac-tubulin (green). Note that IMCD<sup>PC1<sup>WT</sup></sup> cells displays increased PC2 ciliary signal intensity compared to IMCD<sup>pcDNA5</sup> cells. **(f)** Confocal images of IMCD<sup>PC1<sup>V</sup></sup> cells with stable expression of recombinant non-cleavable PC1<sup>V</sup> showing no ciliary staining of PC1<sup>V</sup> and endogenous PC2. Scale bar, 10  $\mu$ m.

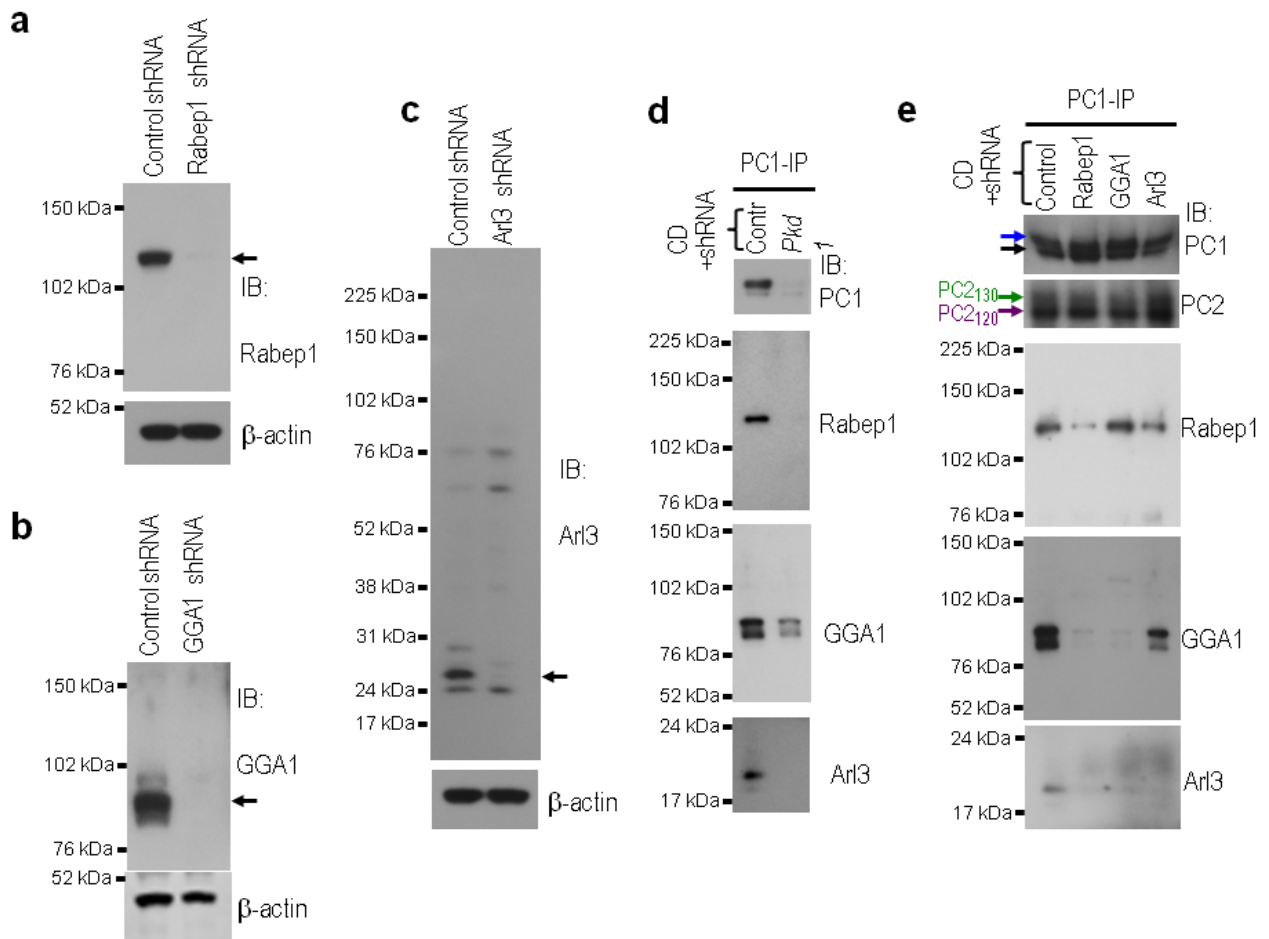

**Supplementary Figure 3** Western blots showing effective knockdown of Rabep1 (**a**), GGA1 (**b**) or Arl3 (**c**). The specific protein bands are indicated by an arrow. The molecular weight markers are shown on left. (**d**) The larger areas of the blots for Fig. 7a. (**e**) The larger areas of the blots for Fig. 7f.

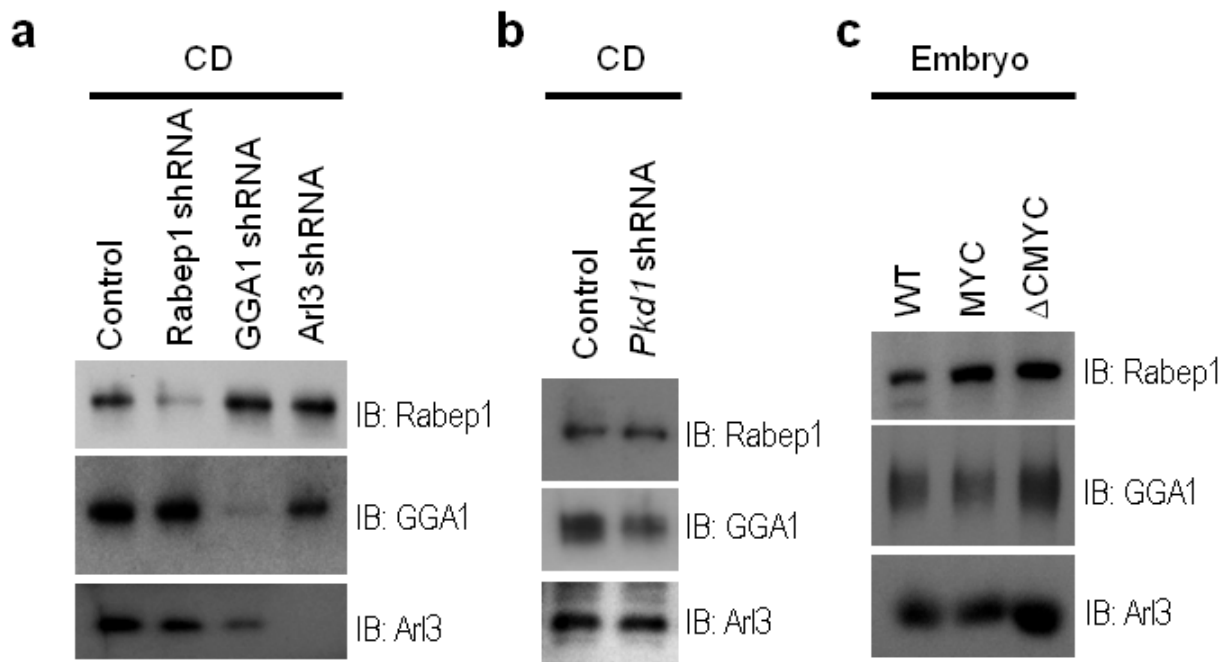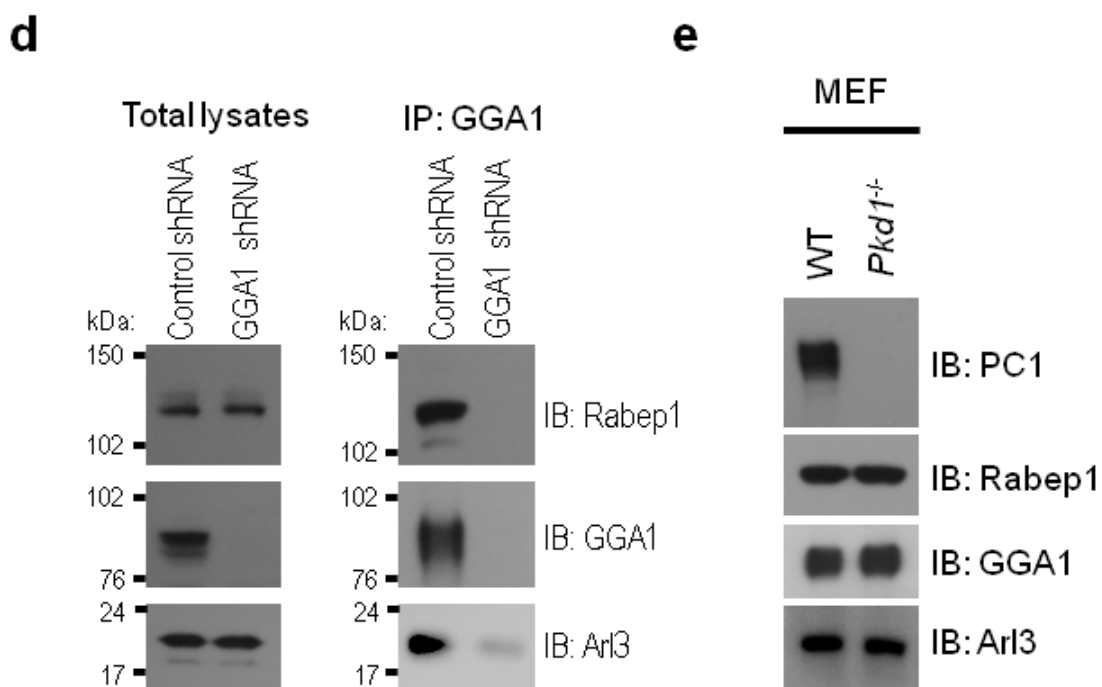

**Supplementary Figure 4** Western blots of various total lysates probed with anti-Rabep1, anti-GGA1 or anti-Arl3. **(a)** Validation of lentiviral shRNA-mediated silencing of the respective genes in CD cells used in Fig. 7f and g. **(b)** Similar levels of Rabep1, GGA1 or Arl3 in CD cells with or without *Pkd1* knockdown used for co-IP experiment in Fig. 7a. **(c)** Similar levels of Rabep1, GGA1 or Arl3 in wild-type (WT), *Pkd1*<sup>MYC/MYC</sup> (MYC) and *Pkd1*<sup>ΔCMYC/ΔCMYC</sup> (ΔCMYC) embryos used for co-IP experiment in Fig. 7b. **(d)** Specificity of co-immunoprecipitation of native GGA1 and Arl3 by anti-GGA1 shown in Fig. 7g is validated using CD cells with GGA1 knockdown. **(e)** Similar levels of Rabep1, GGA1 or Arl3 in wild-type (WT) and *Pkd1*<sup>-/-</sup> MEFs used for co-IP experiment in Fig. 7h.

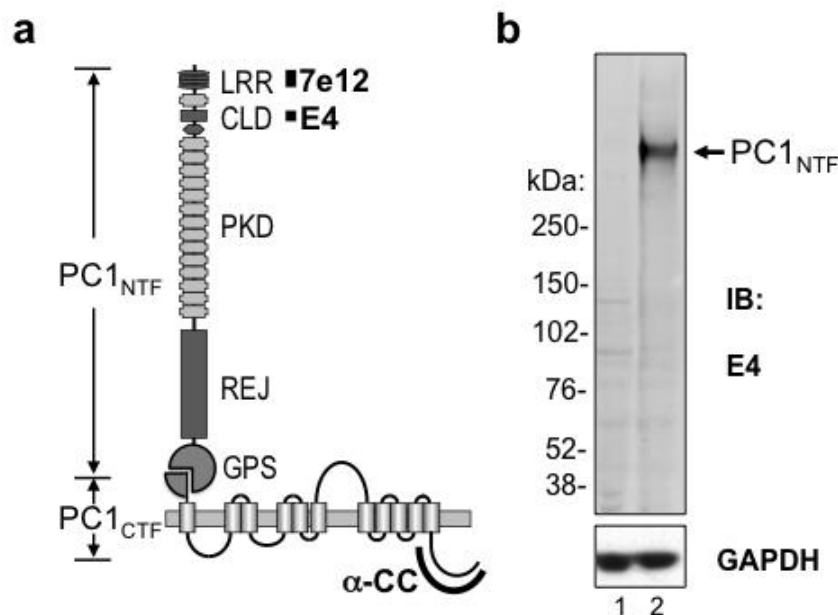

**Supplementary Figure 5** Specificity of PC1 E4 mouse monoclonal antibody. **(a)** A schematic diagram of the domain organization of PC1. PKD: PKD repeats; CLD, C-type lectin binding domain. GPS: G-protein coupled receptor proteolytic cleavage site. E4 monoclonal antibody against PC1 was generated from mice immunized with recombinant 130 aa polypeptide corresponding to residues 406-535 (CLD) of human PC1 protein, as indicated by a black bar. The positions of epitopes recognized by the other antibodies (7e12,  $\alpha$ -CC) used in this study are also indicated. **(b)** Western blots demonstrating the specificity of E4 antibody. E4 detects mouse PC1<sub>NTF</sub> as indicated from lysate of HEK cells with stable expression of mouse full-length *Pkd1* cDNA (lane 2), but not from that of HEK cells containing empty vector (lane 1). The molecular weight marker is shown on left. Western blot with anti-GAPDH shows equal loading.
